# Supplementary material for: Structural characterization of polysaccharides fromCordyceps militarisand their hypolipidemic effects in high fat diet fed mice
Source: Royal Society of Chemistry journal article supplement (doi:10.1039/c8ra09068h), 2018-01-01
Supplement: c8ra09068h1.pdf [file c8ra09068h1.pdf]

## Supporting Information

### Structural characterization of polysaccharides from *Cordyceps militaris* and their hypolipidemic effects in high fat diet fed mice

Zhen-feng Huang<sup>†</sup>, Ming-long Zhang<sup>†</sup>, Song Zhang<sup>\*</sup>, Ya-hui Wang and Xue-wen Jiang

School of Life Science, South China Normal University, Guangzhou 510631, Guangdong, China

<sup>†</sup> These authors contributed equally.

<sup>\*</sup>Correspondence author

## Materials and methods

### Monosaccharide composition analysis

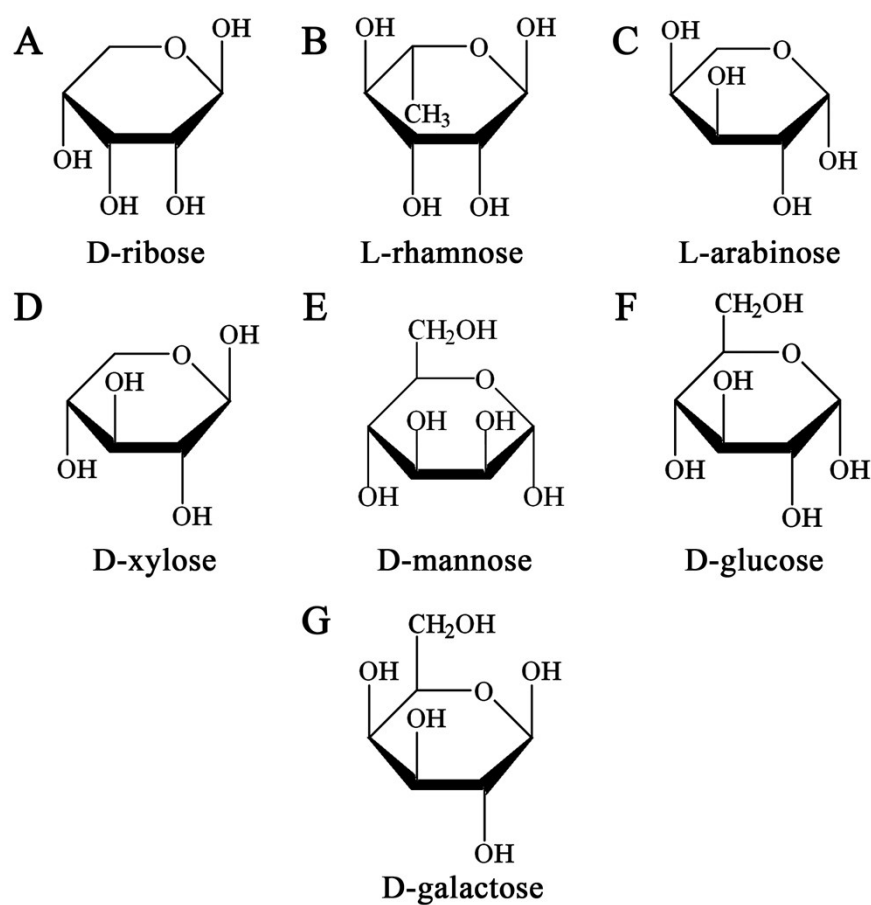

**Fig. S1.** Chemical structures of monosaccharides used in monosaccharide composition analysis. A. D-ribose, B. L-rhamnose, C. L-arabinose, D. D-xylose, E. D-mannose, F. D-glucose, G. D-galactose.
